# Supplementary material
Source: ML conference proceedings conference paper supplement (https://openaccess.thecvf.com/content/CVPR2023/html/Bao_SINE_Semantic-Driven_Image-Based_CVPR_2023_paper.html)
Supplement: Supplementary file 1 [file Bao_SINE_Semantic-Driven_Image-Based_CVPR_2023_supplemental.zip]

Archive with 3 entries (3 files):
- 4531_supply.mp4
- 2023071163.pdf
- readme.txt
