# Supplementary material
Source: ML conference proceedings conference paper supplement (https://openaccess.thecvf.com/content/CVPR2023/html/Bao_SINE_Semantic-Driven_Image-Based_CVPR_2023_paper.html)
Supplement: Supplementary file 1 [file Bao_SINE_Semantic-Driven_Image-Based_CVPR_2023_supplemental.zip › readme.txt]

Our supplementary materials contain two files, i.e., '4531-supp.mp4' and '2023071163.pdf'.  The first file is the video which demonstrates our motivation, key technology of prior-guided editing field, and also shows rendering results with geometric and texture editing. The second file describes more details of our method and experiments, as well as more qualitative results.


Our video is encoded with the FFmpeg encoder x264, and you can find the codecs through the following https://trac.ffmpeg.org/wiki/Encode/H.264 . 
